# Supplementary material for: Strengthening the Immunization System Through Private Provider Engagement to Improve Vaccine Uptake in Urban Settlements of Karachi, Pakistan: A Before–After Study
Source: MDPI journal article supplement (doi:10.3390/vaccines14030205), 2026-02-26
Supplement: s1 [file vaccines-4102579-supplementary.pdf › vaccines-4102579-supplementary.pdf]

Supplementary Figure S1: Project Design

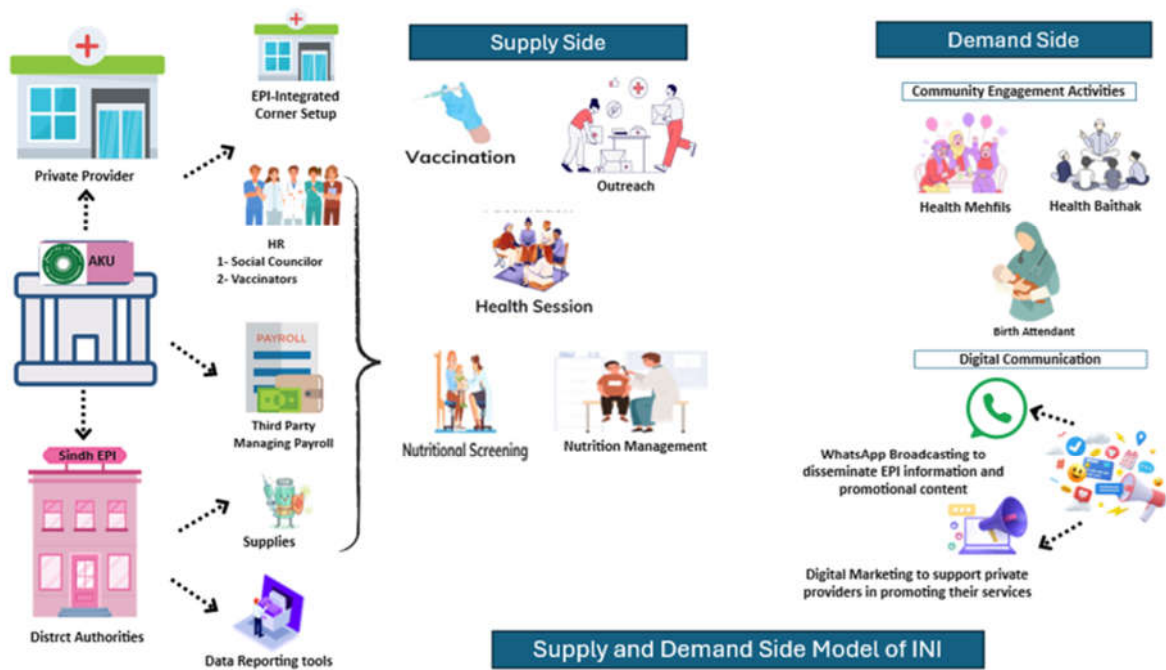

Supplementary Table S1a: Binary Logistic Regression Results for Age-Appropriate Antigen Uptake from Baseline to Endline Among Children Aged 4–11 Months.

| Age-appropriate vaccines | Unadjusted (OR)<br>OR (95% CI) | Adjusted (OR)<br>OR (95% CI) |
|--------------------------|--------------------------------|------------------------------|
| At Birth                 |                                |                              |
| BCG                      | 6.96 (2.38–20.31)              | 6.47 (2.63–15.92)            |
| OPV0                     | 1.82 (0.68–5.45)               | 1.28 (0.55–2.97)             |
| 6 Weeks (2nd Visit)      |                                |                              |
| OPV-1                    | 5.39 (3.15–9.21)               | 5.64 (3.92–8.12)             |
| Pentavalent 1            | 4.99 (2.93–8.53)               | 5.12 (3.48–7.54)             |
| PCV-1                    | 5.04 (2.93–8.64)               | 5.28 (3.51–7.74)             |
| Rotavirus 1              | 4.98 (2.89–8.57)               | 5.15 (3.49–7.59)             |
| 10 Weeks (3rd Visit)     |                                |                              |
| OPV-2                    | 4.60 (2.84–7.43)               | 4.95 (3.62–6.77)             |
| Pentavalent 2            | 4.63 (2.88–7.45)               | 4.93 (3.61–6.75)             |
| PCV-2                    | 4.67 (2.90–7.542)              | 5.01 (3.63–6.91)             |
| Rotavirus 2              | 4.67 (2.92–7.49)               | 4.98 (3.65–6.79)             |
| 14 Weeks (4th Visit)     |                                |                              |
| OPV-3                    | 4.39 (2.66–7.24)               | 4.83 (3.72–6.28)             |
| Pentavalent 3            | 4.28 (2.67–6.87)               | 4.55 (3.55–5.82)             |
| PCV-3                    | 4.21 (2.61–6.79)               | 4.46 (3.48–5.71)             |
| IPV-1                    | 3.92 (2.43–6.34)               | 4.08 (3.25–5.21)             |
| 9 Months (5th Visit)     |                                |                              |
| MR-1                     | 1.52 (1.17–2.08)               | 3.67 (2.37–5.67)             |
| IPV-2                    | 1.49 (1.13–2.02)               | 3.66 (2.39–5.59)             |
| TCV                      | 1.44 (1.06–1.96)               | 3.44 (2.27–5.21)             |

Notes: a. Binary logistic regression was conducted separately for each antigen, treated as an individual outcome, and is presented as unadjusted and adjusted odds ratios (95% confidence intervals) with reference category for each antigen as baseline

b. Adjusted models controlled for age of the child, sex of the child, mother's education, father's education, mother's occupation, father's occupation, and ethnicity

Abbreviations: OR=odds ratio, CI=Confidence Interval

p-value of adjusted model: <0.001

Supplementary Table S1b: Variance Inflation Factors (VIF) Assessing Multicollinearity

| Variable                 | VIF  | Tolerance (1/VIF) |
|--------------------------|------|-------------------|
| <i>Mother Education</i>  | 1.03 | 0.969             |
| Primary                  | 1.26 | 0.791             |
| Secondary & Higher       | 1.79 | 0.558             |
| <i>Ethnicity</i>         |      |                   |
| Balochi                  | 1.23 | 0.814             |
| Sindhi                   | 2.19 | 0.456             |
| Pushto                   | 1.37 | 0.731             |
| Punjabi                  | 2.13 | 0.469             |
| Siraiki                  | 1.68 | 0.594             |
| Other                    | 1.28 | 0.782             |
| <i>Father Education</i>  |      |                   |
| Primary                  | 1.25 | 0.797             |
| Secondary & Higher       | 1.66 | 0.602             |
| <i>Father Occupation</i> | 1.18 | 0.851             |
| <i>Sex of child</i>      | 1.00 | 0.996             |
| Mean VIF                 | 1.47 | -                 |

Notes: All VIF < 3; highest = 2.19. No multicollinearity seen

Supplementary Table S1c: Results of multinomial logistic regression for sociodemographic factors associated with immunization status among children without vaccination card (recall)

| Variable                 | Fully Immunized           |         | Partially Immunized       |         |
|--------------------------|---------------------------|---------|---------------------------|---------|
|                          | Multivariate RRR (95% CI) | p-value | Multivariate RRR (95% CI) | p-value |
| <i>Time</i>              |                           |         |                           |         |
| Baseline                 | Reference                 | -       | Reference                 | -       |
| Endline                  | 6.27 (2.23–17.62)         | 0.001   | 1.42 (0.53–3.81)          | 0.477   |
| <i>Mother Education</i>  |                           |         |                           |         |
| No education             | Reference                 | -       | Reference                 | -       |
| Primary                  | 1.20 (0.31–4.62)          | 0.793   | 0.70 (0.19–2.58)          | 0.586   |
| Secondary & Higher       | 2.28 (0.61–8.54)          | 0.216   | 1.34 (0.33–5.43)          | 0.681   |
| <i>Father Education</i>  |                           |         |                           |         |
| No education             | Reference                 | -       | Reference                 | -       |
| Primary                  | 2.13 (0.60–7.63)          | 0.240   | 1.76 (0.49–6.28)          | 0.378   |
| Secondary & Higher       | 7.27 (1.84–28.80)         | 0.005   | 5.05 (1.36–18.82)         | 0.017   |
| <i>Father Occupation</i> |                           |         |                           |         |
| Unskilled                | Reference                 | -       | Reference                 | -       |
| Skilled                  | 2.41 (1.15–5.05)          | 0.020   | 1.98 (0.94–4.15)          | 0.072   |
| <i>Ethnicity</i>         |                           |         |                           |         |
| Urdu                     | Reference                 | -       | Reference                 | -       |
| Baluchi                  | 0.12 (0.01–1.85)          | 0.126   | 0.17 (0.01–2.10)          | 0.164   |
| Sindhi                   | 0.26 (0.02–3.15)          | 0.285   | 0.39 (0.03–4.90)          | 0.460   |
| Pushto/Hindko            | 0.07 (0.01–0.91)          | 0.042   | 0.16 (0.01–1.97)          | 0.151   |
| Punjabi                  | 0.16 (0.01–2.51)          | 0.190   | 0.18 (0.01–2.85)          | 0.220   |
| Siraiki                  | 0.23 (0.02–3.11)          | 0.264   | 0.35 (0.03–4.51)          | 0.418   |
| Other                    | 0.07 (0.01–0.76)          | 0.029   | 0.13 (0.01–1.52)          | 0.102   |

Supplementary Table S1d: Results of multinomial logistic regression for sociodemographic factors associated with immunization status among children with vaccination card

| Variable                 | Fully Immunized           |         | Partially Immunized       |         |
|--------------------------|---------------------------|---------|---------------------------|---------|
|                          | Multivariate RRR (95% CI) | p-value | Multivariate RRR (95% CI) | p-value |
| <i>Time</i>              |                           |         |                           |         |
| Baseline                 | Reference                 | -       | Reference                 | -       |
| Endline                  | 7.56 (2.84–20.14)         | <0.001  | 2.05 (0.82–5.11)          | 0.120   |
| <i>Mother Education</i>  |                           |         |                           |         |
| No education             | Reference                 | -       | Reference                 | -       |
| Primary                  | 1.31 (0.35–4.87)          | 0.685   | 0.79 (0.22–2.86)          | 0.714   |
| Secondary & Higher       | 1.33 (0.49–3.61)          | 0.566   | 0.87 (0.31–2.40)          | 0.778   |
| <i>Father Education</i>  |                           |         |                           |         |
| No education             | Reference                 | -       | Reference                 | -       |
| Primary                  | 2.38 (0.65–8.72)          | 0.188   | 1.96 (0.53–7.20)          | 0.307   |
| Secondary & Higher       | 6.18 (1.91–20.00)         | 0.003   | 4.38 (1.43–13.43)         | 0.010   |
| <i>Father Occupation</i> |                           |         |                           |         |
| Unskilled                | Reference                 | -       | Reference                 | -       |
| Skilled                  | 2.87 (1.41–5.82)          | 0.004   | 2.30 (1.14–4.65)          | 0.021   |
| <i>Ethnicity</i>         |                           |         |                           |         |
| Urdu                     | Reference                 | -       | Reference                 | -       |

|               |                  |       |                  |       |
|---------------|------------------|-------|------------------|-------|
| Baluchi       | 0.08 (0.01–1.11) | 0.060 | 0.10 (0.01–1.17) | 0.066 |
| Sindhi        | 0.20 (0.02–2.38) | 0.199 | 0.33 (0.03–4.06) | 0.379 |
| Pushto/Hindko | 0.06 (0.01–0.77) | 0.031 | 0.14 (0.01–1.66) | 0.117 |
| Punjabi       | 0.07 (0.01–0.91) | 0.042 | 0.09 (0.01–1.24) | 0.072 |
| Siraiki       | 0.16 (0.01–2.11) | 0.162 | 0.28 (0.02–3.46) | 0.314 |
| Other         | 0.05 (0.00–0.52) | 0.013 | 0.10 (0.01–1.20) | 0.069 |
